# Supplementary material for: Pathology and Prevalence of Antibiotic-Resistant Bacteria: A Study of 398 Pet Reptiles
Source: MDPI journal article supplement (doi:10.3390/ani12101279), 2022-05-17
Supplement: s1 [file s1]

**Table S1.** The specific pathology found / categories treated / reptile species

| Categories of treated pathologies / reptile species | Snakes     |                                  |                                    |   | Lizards                            |
|-----------------------------------------------------|------------|----------------------------------|------------------------------------|---|------------------------------------|
|                                                     | Chelonians | Venomous                         | Non-venomous                       |   |                                    |
| Skin & appendages                                   | 20         | 4                                | 11                                 |   | 26                                 |
| Sensory organs and Nervous system                   | 11         | 7                                | 6                                  |   | 7                                  |
| Digestive system                                    | 99         | 11                               | 20                                 |   | 58                                 |
| Respiratory & cardio / vascular apparatus           | 22         | 8                                | 15                                 |   | 10                                 |
| Urinary system                                      | 3          | 1                                | 1                                  |   | 2                                  |
| The breeding apparatus                              | 6          | 5                                | 6                                  |   | 12                                 |
| Osteo-muscular apparatus                            | 5          | 1                                | 0                                  |   | 6                                  |
| Tumors                                              | -          | 1                                | 1                                  |   | 3                                  |
| Intoxications                                       | -          | -                                | -                                  |   | 1                                  |
| <b>Of which by species of reptile:</b>              |            |                                  |                                    |   |                                    |
|                                                     | Snakes     |                                  |                                    |   |                                    |
|                                                     | N          | N                                | N                                  | N |                                    |
| Chelonians                                          |            | Venomous                         | Non-venomous                       |   | Lizards                            |
| <i>Testudo hermanni</i>                             | 13         | <i>Bitis arietans</i> 1          | <i>Python regius</i> 1             |   | <i>Pogona vitticeps</i> 7          |
| <i>Testudo graeca</i>                               | 9          | <i>Bitis nasicornis</i> 5        | <i>Pantherophis guttatus</i> 1     |   | <i>Iguana iguana</i> 1             |
| <i>Testudo horsfieldii</i>                          | 5          | <i>Vipera transcaucasiana</i> 3  | <i>Boa constrictor</i> 1           |   | <i>Eublepharis macularius</i> 7    |
| <i>Testudo marginata</i>                            | 4          | <i>Agkistrodon bilineatus</i> 2  | <i>Morelia spilota</i> 5           |   | <i>Tupinambis teguixin</i> 4       |
| <i>Trachemys scripta elegans</i>                    | 4          | <i>Pseudocerastes persicus</i> 3 | <i>Aspidites ramsay</i> 3          |   | <i>Gekko grossmanni</i> 3          |
| <i>Pseudemys spp.</i>                               | 2          | <i>Crotalus polystictus</i> 2    | <i>Coronella austriaca</i> 2       |   | <i>Uromastix acanthinura</i> 3     |
| <i>Chelodina longicollis</i>                        | 1          | <i>Cerastes cerastes</i> 2       | <i>Lampropeltis californiae</i> 2  |   | <i>Crotaphytus collaris</i> 2      |
| <i>Graptemys pseudogeografica</i>                   | 1          | <i>Vipera orlovi</i> 2           | <i>Morelia viridis</i> 2           |   | <i>Furcifer pardalis</i> 2         |
| <i>Stigmochelys pardalis</i>                        | 1          | <i>Vipera kaznakovi</i> 2        | <i>Boa constrictor imperator</i> 1 |   | <i>Gambelia wislizenii</i> 2       |
| <i>Terrapene ornata</i>                             | 1          | <i>Bitis gabonica</i> 1          | <i>Corallus caninus</i> 1          |   | <i>Varanus cumingi</i> 2           |
| <i>Centrochelys sulcata</i>                         | 1          | <i>Bitis schneideri</i> 1        | <i>Heterodon nasicus</i> 1         |   | <i>Heloderma suspectum</i> 2       |
|                                                     |            | <i>Crotalus lepidus</i> 1        | <i>Python morulus</i> 1            |   | <i>Acanthosaura lepidogaster</i> 1 |
|                                                     |            | <i>Gloydus halys</i> 1           | <i>Python morulus morulus</i> 1    |   | <i>Chamaeleo calypttratus</i> 1    |
|                                                     |            | <i>Malpolon monspessulanus</i> 1 | <i>Zamenis situla</i> 1            |   | <i>Cordylus catophractus</i> 1     |
|                                                     |            | <i>Montivipera xanthina</i> 1    |                                    |   | <i>Ctenosaura similis</i> 1        |
|                                                     |            | <i>Protopotrops cornuta</i> 1    |                                    |   | <i>Tiliqua scincoides</i> 1        |
|                                                     |            | <i>Vipera aspis</i> 1            |                                    |   |                                    |
| <b>Total turtles: 166</b>                           |            | <b>Venomous: 39</b>              | <b>Non-venomous: 59</b>            |   | <b>Total lizards: 125</b>          |
|                                                     |            | <b>Total snakes: 98</b>          |                                    |   |                                    |

---

Total reptiles: 389

---
